# Supplementary material for: Classification and genetic targeting of cell types in the primary taste and premotor center of the adult Drosophila brain
Source: eLife. 2021 Sep 2;10:e71679. doi: 10.7554/eLife.71679 (PMC8445619; doi:10.7554/eLife.71679)
Supplement: Figure 3—figure supplement 2—source data 1. [file elife-71679-fig3-figsupp2-data1.csv]

	x
1	18.5733649362665
2	8.76173629835767
3	7.17013877315574
4	6.27497955139518
5	5.4045079551194
6	3.32506764528118
7	3.25755750805785
8	3.04370706987054
9	2.89246431584938
10	2.63756750991806
11	2.27131268343365
12	2.11875357798102
13	2.06515110559184
14	1.88817804657596
15	1.6495659705842
16	1.58926034011137
17	1.5746250460481
18	1.52010589760565
19	1.49805806592528
20	1.4803195876772
21	1.4070385459087
22	1.38581163634652
23	1.36414113175547
24	1.26164286305843
25	1.20917316877537
26	1.11524101679166
27	1.08513588144961
28	1.08050062944327
29	1.07455952390508
30	1.06870898145594
31	1.06649416183273
32	1.06116129076379
33	1.01052295623755
34	1.00447109419154
35	0.979935061161583
36	0.959295546649668
37	0.95702719532673
38	0.953250496107718
39	0.947658523261561
40	0.945223215457078
41	0.922810828118276
42	0.920309860538612
43	0.894196925013324
44	0.891599311403668
45	0.888281825786619
46	0.885877728273188
47	0.851020219654105
48	0.84997771317655
49	0.838869984568745
50	0.795836972839317
51	0.780524825138008
52	0.775374583312927
53	0.767031411816023
54	0.75269200009079
55	0.752575001983682
56	0.746942237685281
57	0.737833220238095
58	0.727299938340819
59	0.722925880967774
60	0.72270864875149
61	0.701573751140596
62	0.680167819623573
63	0.676540280544579
64	0.667086520953552
65	0.650512913246276
66	0.627766195711514
67	0.620188659459759
68	0.618775552973112
69	0.618719546964703
70	0.615906023985783
71	0.613136219149964
72	0.609602611616311
73	0.605778150250765
74	0.592996992662432
75	0.577159592547241
76	0.57462379566098
77	0.572312885064586
78	0.572023872708921
79	0.565834085673822
80	0.561602020181117
81	0.561443447188695
82	0.552262330502795
83	0.544795071244209
84	0.542986352109846
85	0.525728718150078
86	0.519850739025378
87	0.518830819027221
88	0.516051463454542
89	0.513098123722908
90	0.511410067214826
91	0.511404789438249
92	0.509789418427642
93	0.495636375519235
94	0.490428474027774
95	0.487085906180297
96	0.486775719801904
97	0.484833221234895
98	0.483726989343673
99	0.481272850124964
100	0.46792906021802
101	0.465642900512722
102	0.458159689843933
103	0.455042706778261
104	0.454046923116861
105	0.430900584252191
106	0.430523294096019
107	0.426244005936335
108	0.422107626524034
109	0.40929113697927
110	0.394694402352168
111	0.384096347330811
112	0.377013515390954
113	0.372109280316485
114	0.363985829594914
115	0.362157767785326
116	0.360174038454621
117	0.35685257013474
118	0.345163310817254
119	0.330762952790614
120	0.315242424310942
121	0
