# Supplementary material for: Classification and genetic targeting of cell types in the primary taste and premotor center of the adult Drosophila brain
Source: eLife. 2021 Sep 2;10:e71679. doi: 10.7554/eLife.71679 (PMC8445619; doi:10.7554/eLife.71679)
Supplement: Figure 3—figure supplement 2—source data 2. [file elife-71679-fig3-figsupp2-data2.csv]

	x
1	9.81162863790881
2	1.59159752520193
3	0.895159221760556
4	0.870471596275779
5	2.07944030983823
6	0.0675101372233295
7	0.213850438187311
8	0.151242754021157
9	0.254896805931316
10	0.366254826484418
11	0.152559105452623
12	0.053602472389179
13	0.176973059015883
14	0.238612075991758
15	0.0603056304728311
16	0.0146352940632704
17	0.0545191484424545
18	0.0220478316803643
19	0.0177384782480834
20	0.0732810417685019
21	0.0212269095621738
22	0.0216705045910532
23	0.102498268697044
24	0.0524696942830516
25	0.0939321519837104
26	0.0301051353420505
27	0.00463525200634618
28	0.00594110553818417
29	0.00585054244913774
30	0.00221481962321723
31	0.00533287106893776
32	0.0506383345262416
33	0.00605186204600394
34	0.0245360330299617
35	0.0206395145119144
36	0.00226835132293846
37	0.00377669921901225
38	0.00559197284615709
39	0.00243530780448287
40	0.0224123873388015
41	0.00250096757966434
42	0.0261129355252883
43	0.00259761360965616
44	0.00331748561704825
45	0.0024040975134314
46	0.0348575086190825
47	0.00104250647755533
48	0.0111077286078047
49	0.0430330117294287
50	0.0153121477013087
51	0.00515024182508106
52	0.00834317149690356
53	0.0143394117252336
54	0.000116998107107524
55	0.0056327642984012
56	0.00910901744718551
57	0.0105332818972766
58	0.00437405737304508
59	0.000217232216283558
60	0.0211348976108942
61	0.0214059315170227
62	0.00362753907899394
63	0.00945375959102757
64	0.0165736077072755
65	0.0227467175347618
66	0.00757753625175528
67	0.00141310648664672
68	5.60060084098257e-05
69	0.00281352297891968
70	0.0027698048358189
71	0.00353360753365284
72	0.00382446136554582
73	0.0127811575883331
74	0.0158374001151915
75	0.00253579688626082
76	0.00231091059639366
77	0.000289012355665585
78	0.00618978703509854
79	0.00423206549270472
80	0.000158572992422612
81	0.00918111668590016
82	0.00746725925858605
83	0.00180871913436265
84	0.0172576339597678
85	0.00587797912470045
86	0.0010199199981572
87	0.00277935557267883
88	0.00295333973163425
89	0.00168805650808124
90	5.27777657721717e-06
91	0.00161537101060716
92	0.0141530429084071
93	0.00520790149146066
94	0.00334256784747733
95	0.000310186378392641
96	0.00194249856700879
97	0.00110623189122216
98	0.00245413921870907
99	0.013343789906944
100	0.00228615970529811
101	0.00748321066878943
102	0.00311698306567165
103	0.000995783661399796
104	0.0231463388646698
105	0.000377290156172549
106	0.00427928815968337
107	0.00413637941230149
108	0.0128164895447642
109	0.0145967346271016
110	0.0105980550213568
111	0.00708283193985737
112	0.00490423507446935
113	0.00812345072157095
114	0.00182806180958761
115	0.00198372933070456
116	0.003321468319881
117	0.0116892593174867
118	0.0144003580266394
119	0.0155205284796724
120	0.315242424310942
