# Supplementary material for: Classification and genetic targeting of cell types in the primary taste and premotor center of the adult Drosophila brain
Source: eLife. 2021 Sep 2;10:e71679. doi: 10.7554/eLife.71679 (PMC8445619; doi:10.7554/eLife.71679)
Supplement: Supplementary file 1. — Each row of the database describes an individual split-GAL4 line generated in this study. The targeted cell type is noted in the ‘Cell type’ column. The ‘AD’ and ‘DBD’ columns note the AD and DBD hemidrivers that compose each line. The unique stable split code identifies each line and can be found in the ‘SS number’ column. ‘SEZ Split-GAL4 Collection code’ provides a shorter, unique identifier for each split-GAL4 line that is specific to this study. ‘Quality: (P)oor, (G)ood, (E)xcellent, or (I)deal’ column ranks the quality of each line, while ‘Quality notes’ provides a short, qualitative description of off-target expression in each line. The ‘Imagery available: (P)olarity (M)CFO or (B)oth’ notes which types of image data are available for each line at https://splitgal4.janelia.org/. [file elife-71679-supp1.csv]

Cell type	AD	DBD	SS number	SEZ Split-GAL4 Collection code	Quality: (P)oor, (G)ood, (E)xcellent, or (I)deal	Quality notes	Imagery available: (P)olarity (M)CFO or (B)oth
usnea	VT033636-p65ADZp in attP40 BJD_107H06_BB_21	VT019345-ZpGdbd in attP2 BJD_107B05_AV_01	SS15725	SEZ-419	E	Contains sparse T, bilateral VLP neuron and a neuron in the AG	M
puddle	59A06-p65ADZp in attP40	54A09-ZpGdbd in attP2	SS27600	SEZ-423	E		P
bubbA	VT020596-p65ADZp in attP40	VT034628-ZpGDBD in attP2	SS27911	SEZ-424	P	Also contains SLP neurons and secretory neurons in the VNC
gazebo	VT031145-p65ADZ in attP40	VT019732-ZpGdbd in attP2	SS28878	SEZ-226	E	One descending neuron in labeled on the right side, lightlt stained small VLP neuron in each side	B
bobber	VT038216-p65ADZp in attP40 BJD_101F07_BB_21	VT050218-ZpGDBD in attP2 BJD_105E08_AV_01	SS29032	SEZ-005	G	~10 neurons other neurons in T1, T2, T3	P
basket	38E08-p65ADZp in attP40	47B01-ZpGDBD in attP2	SS29227	SEZ-001	E	2 cells lightly stained in VNC	B
kitty	VT059788-p65ADZ in attP40 BJD_114G11_BB_21	93B07-ZpGdbd in attP2	SS29458	SEZ-058	G	Other neurons in SLP, SCL and LH, look like lkr neurons, a few neurons in lower VNC	P
kitty	VT044655-p65ADZp in attP40 BJD_121F05_BB_21	VT046005-ZpGdbd in attP2 BJD_123G10_AV_01	SS29466	SEZ-153	E	~4 neurons labeled in VNC	B
kitty	VT029586-p65ADZ in attP40 BJD_126H06_BB_21	VT043015-ZpGdbd in attP2 BJD_118C10_AV_01	SS29481	SEZ-059	G	many small neurons in medulla, 2-3 neurons/side in VNC	B
rocket	VT064567-p65ADZp in attP40 BJD_106B08_BB_21	VT010262-ZpGDBD in attP2 BJD_109F07_AV_01	SS29686	SEZ-053	G	central brain very clean but ~8 neurons/side are stained in VNC brightly	B
rocket	VT015830-p65ADZp in attP40 BJD_123D08_BB_21	VT010262-ZpGDBD in attP2 BJD_109F07_AV_01	SS29687	SEZ-054	G	2 lightly stained neurons/side in SLP, several unilateral neurons in VNC and lightly stained arborizations in AG	P
rocket	24A07-p65ADZp in attP40	VT010262-ZpGDBD in attP2 BJD_109F07_AV_01	SS29688	SEZ-055	G	central brain very clean, many neurons in T2 and one neuron on the right of T3	B
justice	VT021853-p65ADZp in attP40 BJD_123E05_BB_21	VT020126-ZpGdbd in attP2 BJD_126D02_AV_01	SS29812	SEZ-062	G	Lightly stained other neuron on left of T3, stochastic and contains shurg ascending neuron	P
justice	VT020126-p65ADZp in attP40 BJD_126D02_BB_21	VT021853-ZpGDBD in attP2 BJD_123E05_AV_01	SS29813	SEZ-063	G	Stochastic and contains shrug ascending neuron	B
loch ness	VT047885-p65ADZp in attP40 BJD_129C07_BB_21	VT017862-ZpGdbd in attP2 BJD_120B11_AV_01	SS29822	SEZ-056	G	Diffuse staining in the higher brain and a number of ascending neurons from VNC, but loch ness is bright and clear	B
genie	VT011132-p65ADZp in attP40 BJD_109F09_BB_21	VT019071-ZpGDBD in attP2 BJD_110B02_AV_01	SS30373	SEZ-067	I	gorgeous descending genie neuron, arborizes in T1 and T2	B
genie	47H03-p65ADZp in attP40	VT019071-ZpGDBD in attP2 BJD_110B02_AV_01	SS30377	SEZ-068	E	one lightly stained neuron ascending from VNC to PVLP, 1 neuron/side in SLP	B
peacock	VT040592-p65ADZp in attP40 BJD_127E11_BB_21	19F09-ZpGdbd in attP2	SS30409	SEZ-072	G	many very lightly stained neurons in superior CB, 3 neurons/side in VNC that are brightly stained	P
peacock	VT049365-p65ADZp in attP40 BJD_128D05_BB_21	19F09-ZpGdbd in attP2	SS30410	SEZ-073	P	this line also contains Yoshi Aso's aDT10 MB neuron (SS03283) plus several PLP neurons and 1 ascending neuron from VNC plus one neuron in T3	B
usnea and cleaver	VT038544-p65ADZp in attP40 BJD_115G07_BB_21	VT019345-ZpGdbd in attP2 BJD_107B05_AV_01	SS31022	SEZ-087	P	2 other brightly stained OL neurons/side that project to CB. 2-3 cell types clearly seen in the SEZ	B
earmuff	18B06-p65ADZp in attP40	VT050733-ZpGDBD in attP2 BJD_129C08_AV_01	SS31063	SEZ-089	G	2 other neurons in VNC, 1 ascends to CB and passes through the SEZ. Some other bright staining in the abdominal ganglion that may or may not be neurons	B
horseshoe2 and cowboy	VT025786-p65ADZp in attP40 BJD_110D02_BB_21	VT057278-ZpGdbd in attP2 BJD_122B05_AV_01	SS31067	SEZ-090	G	staining is dim, ~8 other brightly stained neurons in VNC	B
bract	25A01-p65ADZp in attP40	VT058723-ZpGdbd in attP2 BJD_105H05_AV_01	SS31320	SEZ-129	P	additional bilateral neurons with cell bodies in the LCBR	M
bract	37D11-p56ADZp in attP40	VT058723-ZpGdbd in attP2 BJD_105H05_AV_01	SS31321	SEZ-130	G	labeling in the optic lobes and other pair of cell bodies in the SEZ	B
bluebell and bluebird	42E06-p65ADZp in attP40	VT050223-ZpGdbd in attP2 BJD_108H06_AV_01	SS31326	SEZ-127	I	does not appear to contain snail, does not have any descending neurons.	B
bluebell and snail and foxglove	VT050223-p65ADZp in attP40 BJD_108H06_BB_21	VT037804-ZpGDBD in attP2 BJD_113G08_AV_01	SS31328	SEZ-092	G	also contains snail, slink, and sneaker?	B
Fdg	81E10-p65ADZp in attP40	VT037804-ZpGDBD in attP2 BJD_113G08_AV_01	SS31333	SEZ-093	G	1 descending neuron, several lightly stained neurons arborizing broading in the VNC, bright sensory inputs into T3	P
bluebell and snail and foxglove	VT050223-p65ADZp in attP40 BJD_108H06_BB_21	VT022244-ZpGDBD in attP2 BJD_123E07_AV_01	SS31341	SEZ-094	G	very bright, also contains snail	B
Fdg	81E10-p65ADZp in attP40	VT022244-ZpGDBD in attP2 BJD_123E07_AV_01	SS31345	SEZ-095	E	Several light broadly arborizing neurons in the VNC, very bright sersory inputs into T3	B
gallinule and trogon	VT027706-p65ADZ in attP40 BJD_115E08_BB_21	23E04-ZpGDBD in attP2	SS31362	SEZ-134	I		B
mesa	VT022244-p65ADZp in attP40 BJD_123E07_BB_21	23E10-ZpGDBD in attP2	SS31366	SEZ-096	E	a few small neurons in superior optic lobe, lightly covers sparse-T	B
mesa	42E06-p65ADZp in attP40	23E10-ZpGDBD in attP2	SS31369	SEZ-097	E	lightly covers sparse-T	B
sink and sync	VT050223-p65ADZp in attP40 BJD_108H06_BB_21	24A02-ZpGdbd in attP2	SS31372	SEZ-098	G	Covers two different neuron types, sink is interneuron and sync is descending neuron. No other neurons in CNS.	B
bract	25A01-p65ADZp in attP40	37D11-ZpGDBD in attP2	SS31386	SEZ-132	E	Also labels some Kenyon cells and a few neurons in the abdominal ganglion	B
bluebell and foxglove	VT050223-p65ADZp in attP40 BJD_108H06_BB_21	42E06-ZpGdbd in attP2/ TM3	SS31388	SEZ-099	G	brightly labels 1 neuron in the SMP/SLP	B
snake	VT019060-p65ADZp in attP40 BJD_104B02_BB_21	VT006486-ZpGDBD in attP2 BJD_115B11_AV_01	SS31705	SEZ-103	G	CNS is quite clean, two neurons with large-caliber axons in T2	B
snake	VT019060-p65ADZp in attP40 BJD_104B02_BB_21	28C05-ZpGdbd in attP2	SS31708	SEZ-104	E	~4 sensory? neurons in the abdominal ganglion	P
snake	VT006486-p65ADZp in attP40 BJD_115B11_BB_21	28C05-ZpGdbd in attP2	SS31714	SEZ-105	E	4 neurons in the abdominal ganglion only seen in polarity staining	B
gallinule	VT026953-p65ADZp in attP40 BJD_113E11_BB_21	VT027273-ZpGdbd in attP2 BJD_115E05_AV_01	SS32060	SEZ-106	G	covers a single gallinule. Stochastic and also contains projection neurons.	P
bridle	VT026953-p65ADZp in attP40 BJD_113E11_BB_21	71G01-ZpGdbd in attP2	SS32066	SEZ-162	I		P
gallinule	45B08-p65ADZp in attP40	VT026953-ZpGdbd in attP2 BJD_113E11_AV_01	SS32119	SEZ-112	E	may lightly label LH and OL neurons, off target expression seems stochastic	B
bridle	71G01-p65ADZp in attP40	VT026953-ZpGdbd in attP2 BJD_113E11_AV_01	SS32123	SEZ-161	I		P
diatom	VT004972-p65ADZp in attP40 BJD_116E02_BB_21	VT051757-ZpGDBD in attP2 BJD_116A05_AV_01	SS32361	SEZ-114	I	Novel sensory inputs into the SEZ from proboscis labellum	B
clubround and clubround2	VT037488-p65ADZ in attP40 BJD_122G10_BB_21	VT033629-ZpGdbd in attP2 BJD_124D05_AV_01	SS32388	SEZ-115	G	projections of other neurons arborizing in LH, perhaps olfactory projection neurons?	B
haystack	VT037488-p65ADZ in attP40 BJD_122G10_BB_21	54H10-ZpGDBD in attP2	SS32391	SEZ-116	I	dim	B
oinkT	VT027323-p65ADZ in attP40 BJD_124C12_BB_21	94H07-ZpGdbd in attP2	SS32394	SEZ-117	I		B
clubround	VT033629-p65ADZp in attP40 BJD_124D05_BB_21	46E07-ZpGDBD in attP2	SS32398	SEZ-119	P	many additional neurons in the superior central brain	B
spray	VT032404-p65ADZp in attP40 BJD_127A07_BB_21	VT051757-ZpGDBD in attP2 BJD_116A05_AV_01	SS32404	SEZ-121	G	1 other neuron in central brain, several lightly labeled neurons in VNC	B
amulet	VT019900 p65ADZp in attP40 BJD_144C11_BB_21	65D06-ZpGdbd in attP2	SS32423	SEZ-122	G	several other more lightly stained neurons in central brain, 1 or 2 broadly arborizing neurons in VNC. Also contains bower	B
marge	46E07-p65ADZp in attP40	VT037488-ZpGdbd in attP2 BJD_122G10_AV_01	SS32463	SEZ-123	I		B
clubround	46E07-p65ADZp in attP40	VT033629-ZpGdbd in attP2 BJD_124D05_AV_01	SS32464	SEZ-124	G	more lightly labeled neurons in SMP, lightly labeled descending or ascending neurons	B
tundra	VT026668-p65ADZp in attP40 BJD_101D05_BB_21	50B06-ZpGdbd in attP2	SS32902	SEZ-144	G	also labels one central complex? Neuron and another easily distinguishable neuron in the CNS. VNC has 4 labeled interneurons in T1 and T2	B
wafflecone	VT037560-p65ADZ in attP40 BJD_127C03_BB_21	VT025996-ZpGdbd in attP2 BJD_113E01_AV_01	SS32949	SEZ-150	G	1 other neuron in the VNC	P
wafflecone	VT037560-p65ADZ in attP40 BJD_127C03_BB_21	79B08-ZpGdbd in attP2	SS32950	SEZ-151	P	clean in the CB but many neurons in the VNC. 2 neurons with giant cell bodies and large caliber axons in T2, 1 more neuron/side in the T2 and T3.	B
tundra	78A01-p65ADZp in attP40	VT060734-ZpGdbd in attP2 BJD_106A03_AV_01	SS32965	SEZ-152	E	requires MCFO to determine cell types	P
gallinule and cowboy	VT037574-p65ADZ in attP40 BJD_129H09_BB_21	VT030345-ZpGdbd in attP2 BJD_110F08_AV_01	SS34088	SEZ-177	G	also covers segmentally repeated neurons in VNC	B
gallinule	VT037574-p65ADZ in attP40 BJD_129H09_BB_21	VT015971-ZpGdbd in attP2 BJD_122E08_AV_01	SS34089	SEZ-178	E	several other neurons lightly covered in SEZ	B
gallinule	50H07-p65ADZp in attP40	19A11-ZpGdbd in attP2	SS34096	SEZ-179	E	lightly labeled small neurons in OL	P
mist	VT028551-p65ADZp in attP40 BJD_120G12_BB_21	VT061717-ZpGdbd in attP2 BJD_106A06_AV_01	SS34732	SEZ-182	I		P
mist	VT061717-p65ADZp in attP40 BJD_106A06_BB_21	VT028551-ZpGdbd in attP2 BJD_120G12_AV_01	SS34739	SEZ-183	G	one bright neuron with cell body in SLP, mist is dim in comparison	P
balloon	76F05-p65ADZp in attP40	VT043075-ZpGdbd in attP2 BJD_111D04_AV_01	SS35259	SEZ-189	G	neurons brightly labeled in AG, other lightly labeled ascending neurons and PAM neurons labeled	B
buddy	VT006555-p65ADZp in attP40 BJD_106E09_BB_21	VT020126-ZpGdbd in attP2 BJD_126D02_AV_01	SS35279	SEZ-190	E	I neuron per side in VLP	P
asteroid	76F05-p65ADZp in attP40	VT000357-ZpGdbd in attP2 BJD_100A03_AV_01	SS35281	SEZ-191	E	1 neuron lightly labeled ascending from T3	P
asteroid	72F12-p65ADZp in attP40	VT000357-ZpGdbd in attP2 BJD_100A03_AV_01	SS35282	SEZ-192	I		P
box	VT020126-p65ADZp in attP40 BJD_126D02_BB_21	VT000357-ZpGdbd in attP2 BJD_100A03_AV_01	SS35283	SEZ-193	P	ascending neurons arborizing in the SEZ, a number of other overlapping VNC neurons also labled	B
fudog	VT038225-p65ADZp in attP40 BJD_108A03_BB_21	69E06-ZpGDBD in attP2	SS35291	SEZ-196	E	one other neuron type in T1	M
sundrop and diatom	VT063220-p65ADZp in attP40 BJD_119B10_BB_21	VT038225-ZpGDBD in attP2 BJD_108A03_AV_01	SS35298	SEZ-197	G	also covers sensory projections into AG as well as neurons in T3	B
meteor and balloon	VT021853-p65ADZp in attP40 BJD_123E05_BB_21	VT014724-ZpGDBD in attP2 BJD_113A01_AV_01	SS35410	SEZ-200	P	several ascending neurons and segmentally repeated interneurons in VNC, also covers balloon, kelp, and hyacinth	B
meteor	VT021853-p65ADZp in attP40 BJD_123E05_BB_21	VT019422-ZpGdbd in attP2 BJD_122F05_AV_01	SS35412	SEZ-201	G	diffuse ascending neurons with cell bodies in T1	P
meteor	VT021853-p65ADZp in attP40 BJD_123E05_BB_21	VT058947-pZpGdbd in attP2 BJD_144F08_AV_01	SS35420	SEZ-202	I	also covers sparse T on the left	P
kelp and hydrangea	20G07-p65ADZp in attP40	VT043685-ZpGdbd in attP2 BJD_127H04_AV_01	SS35814	SEZ-205	G		P
Salivary MN13	VT014724-p65ADZp in attP40 BJD_113A01_BB_21	VT000837-ZpGDBD in attP2 BJD_106C04_AV_01	SS35823	SEZ-208	G	MN13 is more strongly stained but there are many less strongly stained neurons in the SEZ. At least 4 other neurons in the VNC.	B
genie	33G04-p65ADZp in attP40	72D08-ZpGdbd in attP2	SS35835	SEZ-211	G	One other cell type in T2	B
lion	89E07-p65ADZp in attP40	VT045978-ZpGdbd in attP2 BJD_108F06_AV_01	SS36657	SEZ-213	G	One other neuron in the FB, several neurons in the lower VNC, but only one brightly stained	B
planter	VT037554-p65ADZ in attP40 BJD_110H12_BB_21	VT045978-ZpGdbd in attP2 BJD_108F06_AV_01	SS36658	SEZ-214	I	very weak	P
usnea	VT037525-p65ADZp in attP40 BJD_129A10_BB_21	VT033627-ZpGDBD in attP2 BJD_121A07_AV_01	SS37122	SEZ-218	E	one lightly stained neuron in T1, may be ascending	P
willow	09B09-p65ADZp in attP40	VT041043-ZpGDBD in attP2 BJD_104H09_AV_01	SS37135	SEZ-219	I	Super nice!	P
whisker	67A06-p65ADZp in attP40	37E06-ZpGdbd in attP2	SS37140	SEZ-220	E	2 other neurons in VNC, dissection is not perfect	P
cradle	19D12-p65ADZp in attP40	VT042792-ZpGdbd in attP2 BJD_115H05_AV_01	SS37153	SEZ-222	G	two different neuron types that are very overlapping in the SEZ. One has ventral cell bodies, the other lateral. Also stains ~3 other neuons in VNC.	B
peafowl	VT043070-p65ADZp in attP40 BJD_108C11_BB_21	VT017421-ZpGDBD in attP2 BJD_104A02_AV_01	SS37792	SEZ-362	P	Many other ascending neurons and VNC neurons, peafowl is visible in higher brain	B
gnome	VT049978-p65ADZp in attP40 BJD_128D10_BB_21	VT033627-ZpGDBD in attP2 BJD_121A07_AV_01	SS37818	SEZ-232	G	gnome is lightly labeled. SLP neuron is quite bright.	B
aDT6	VT044959-p65ADZp in attP40 BJD_118D08_BB_21	VT043070-ZpGDBD in attP2 BJD_108C11_AV_01	SS37840	SEZ-235	G	brain is clean but 2-3 secretory-looking neurons in VNC	P
damsel	75C10-p65ADZp in attP40	VT020122-ZpGDBD in attP2 BJD_101A11_AV_01	SS38113	SEZ-237	E	Might lightly label another MN type in T2	B
landslide	50C12-p65ADZp in JK22C	VT049369-ZpGDBD in attP2 BJD_128D07_AV_01	SS38119	SEZ-239	I	neuron with cell body/arborization in GNG, sendd arborizations to lobula	P
moor	VT026668-p65ADZp in attP40 BJD_101D05_BB_21	50C12-ZpGDBD in attP2	SS38140	SEZ-240	I		B
mandala	31F06-p65ADZp in attP40	75H10-ZpGDBD in attP2	SS38164	SEZ-243	E	Also lightly labels a few DNg36 neurons	B
mandala	VT026667-p65ADZp in attP40 BJD_122G02_BB_21	75H10-ZpGDBD in attP2	SS38165	SEZ-244	I		B
kokopelli	VT043284-p65ADZp in attP40 BJD_102A06_BB_21	VT000252-ZpGdbd in attP2 BJD_115B04_AV_01	SS38523	SEZ-247	G	May contain two different cell types, one lightly stained neuron in VNC	B
mothership	VT008534-p65ADZp in attP40 BJD_106F04_BB_21	VT002408-ZpGDBD in attP2 BJD_109D04_AV_01	SS38535	SEZ-248	E	Descending neuron with arborizations in back of GNG. Several other lightly stained neuronsin VNC and CNS.	P
horn	VT058557-p65ADZp in attP40 BJD_112A02_BB_21	VT025997-ZpGdbd in attP2 BJD_113E02_AV_01	SS38555	SEZ-253	G	Central brain nice and clean but ~8 brightly labeled interneurons in T1 and T3	B
tinctoria	14H09-p65ADZp in attP40	47F12-ZpGdbd in attP2	SS39007	SEZ-254	G	two other neurons labeled in FB/EB area, 3-4 brightly labeled interneurons in T2 and T3 on left side	P
indigo	VT063741-p65ADZp in attP40 BJD_122C04_BB_21	84B09-ZpGDBD in attP2	SS39018	SEZ-255	E	1 other neuron in SIP	B
indigo	VT007182-p65ADZp in attP40 BJD_119G01_BB_21	84B09-ZpGDBD in attP2	SS39019	SEZ-256	I		B
tinctoria	14H09-p65ADZp in attP40	VT019079-ZpGdbd in attP2 BJD_126B11_AV_01	SS39020	SEZ-257	G	Also covers TPN1	B
portal	VT063741-p65ADZp in attP40 BJD_122C04_BB_21	VT019079-ZpGdbd in attP2 BJD_126B11_AV_01	SS39024	SEZ-258	E	Also may stochastically label TPN1	P
indigo	84B09-p65ADZp in attP40	VT063741-ZpGdbd in attP2 BJD_122C04_AV_01	SS39033	SEZ-260	E	One other neuron in left SIP	P
peahen	38D01-p65ADZp in attP40	VT057283-ZpGDBD in attP2 BJD_105G01_AV_01	SS39038	SEZ-024	I		B
aDT6	20E08-p65ADZp in attP40	VT057283-ZpGDBD in attP2 BJD_105G01_AV_01	SS39040	SEZ-262	E	on other neuron on right side of CNS	B
aDT6	VT057283-p65ADZp in attP40 BJD_105G01_BB_21	20E08-ZpGdbd in attP2	SS39052	SEZ-263	E	one other lightly stained neuron type in ICL?	P
aDT6	VT039458-p65ADZp in attP40 BJD_115G09_BB_21	20E08-ZpGdbd in attP2	SS39054	SEZ-264	I	lightly labeled	P
pampa	VT056374-p65ADZp in attP40 BJD_114E11_BB_21	VT008142-ZpGdbd in attP2 BJD_116F08_AV_01	SS39448	SEZ-277	E	contains another neuron in the prow and a DN with a large cell body, but not in every sample	P
aSG4	VT020596-p65ADZp in attP40 BJD_120C12_BB_21	68B03-ZpGDBD in attP2	SS39453	SEZ-280	P	very dim with another neuron type in the PI. VNC contains bright secretory-type neurons in lower half	B
spray	VT028317-p65ADZp in attP40 BJD_117F05_BB_21	VT009674-pZpGdbd in attP2 BJD_144C10_AV_01	SS39867	SEZ-292	G	covers a number of neurons in the VNC	B
weaver	VT040572-p65ADZp in attP40 BJD_127E08_BB_21	VT005106-ZpGDBD in attP2 BJD_125A09_AV_01	SS39883	SEZ-296	E	also may cover one interneuron in T2	B
hyacinth	VT009674 p65ADZp in attP40 BJD_144C10_BB_21	VT012330-ZpGdbd in attP2 BJD_125F10_AV_01	SS39890	SEZ-297	I		B
kelp and hydrangea	20G07-p65ADZp in attP40	VT028317-ZpGdbd in attP2 BJD_117F05_AV_01	SS39895	SEZ-299	G	Also contains 1 bilateral SLP neuron. VNC is clean, may dimly label one neuron in right T3	B
oinkU	22E12-p65ADZp in attP40	64C11-ZpGdbd in attP2	SS39905	SEZ-300	P	Also covers a broadly arborizing OL neuron in lobula? And ~4 ascending neurons that arborize in T3 and T2. oinkU not visible is stable split with IVS-myr-FLAG, try UAS-CsChrimson in attP18	B
cantaloupe	VT037820-p65ADZ in attP40 BJD_111A02_BB_21	85F12-ZpGdbd in attP2	SS39914	SEZ-301	G	Brain is clean but ~8 small neurons are labeled in the AG that acend to T1 along the midline	B
oval	VT021374-p65ADZp in attP40 BJD_113C10_BB_21	VT037820-ZpGdbd in attP2 BJD_111A02_AV_01	SS39916	SEZ-302	I	Descending neuron not covered by the DN collection. May lightly label two large cell bodies in inferior SEZ	B
broom	VT021374-p65ADZp in attP40 BJD_113C10_BB_21	85F12-ZpGdbd in attP2	SS39923	SEZ-303	I	Interesting neuron that arborizes in posterior GNG, IPS, and SPS	B
tophat	VT030322-p65ADZ in attP40 BJD_117G08_BB_21	85F12-ZpGdbd in attP2	SS39932	SEZ-304	P	Obscured by ~4 rocket neurons per side, SLP neurons that project to SMP. Also covers ~10 interneurons in VNC	P
whisker	12G04-p65ADzp in attP40	73H04-ZpGDBD in attP2	SS39947	SEZ-305	I	Very lightly covers 1 interneuron in AG	B
tophat	76B02-p65ADZp in attP40	85F12-ZpGdbd in attP2	SS39993	SEZ-308	E	Contains one interneuron type in T2, very good line	B
foxglove	VT019012-p65ADZp in attP40 BJD_122F02_BB_21	VT022244-ZpGDBD in attP2 BJD_123E07_AV_01	SS40909	SEZ-265	G	also labels ~10 mushroom body neurons on each side	P
foxglove	VT022244-p65ADZp in attP40 BJD_123E07_BB_21	VT019012-ZpGdbd in attP2 BJD_122F02_AV_01	SS40926	SEZ-266	E	also lightly labels several higher brain neurons on a few small OL neurons. Labels one sensory projection in T2-T3	B
diatom	33H04-p65ADZp in attP40	50H07-ZpGdbd in attP2	SS40945	SEZ-318	I	Sensory inputs to AG/T3?	B
brontosaraus	VT008686-p65ADZp in attP40 BJD_125E06_BB_21	27A11-ZpGDBD in attP2	SS40950	SEZ-319	I	Very lightly labeled	B
tundra	VT062870-p65ADZp in attP40 BJD_128H08_BB_21	50B06-ZpGdbd in attP2	SS41386	SEZ-320	E	One cell type in T1, could be stochastic	P
loch ness	VT025980-p65ADZp in attP40 BJD_110D04_BB_21	81A04-ZpGdbd in attP2/ TM3	SS41389	SEZ-321	G	Three other cell types in brain, many other cell types in VNC	B
kitty	VT062870-p65ADZp in attP40 BJD_128H08_BB_21	VT025980-ZpGDBD in attP2 BJD_110D04_AV_01	SS41391	SEZ-323	G	Brightly labeled descending neurons from AG and interneuron in T3	P
horseshoe2	VT025786-p65ADZp in attP40 BJD_110D02_BB_21	VT043147-ZpGdbd in attP2 BJD_114A12_AV_01	SS41397	SEZ-324	E	A few neurons in the OL, one interneuron in T2	P
seagull	VT036302-p65ADZp in attP40 BJD_118A02_BB_21	VT043147-ZpGdbd in attP2 BJD_114A12_AV_01	SS41402	SEZ-325	E	Very lightly labeled interneurons in T1	P
horseshoe	VT010264-p65ADZp in attP40 BJD_103F08_BB_21	VT040018-ZpGdbd in attP2 BJD_111B10_AV_01	SS41410	SEZ-327	P	Lots of ascending neurons from T2	P
horseshoe	VT063219-p65ADZ in attP40 BJD_119B09_BB_21	VT010264-ZpGDBD in attP2 BJD_103F08_AV_01	SS41414	SEZ-329	P	Many ascending neurons form T1, interneurons in T1/T2	P
horseshoe	VT036302-p65ADZp in attP40 BJD_118A02_BB_21	VT010264-ZpGDBD in attP2 BJD_103F08_AV_01	SS41417	SEZ-331	G	Ascending neurons from T1, one interneuron in right T2	B
horntail	VT043284-p65ADZp in attP40 BJD_102A06_BB_21	VT026347-ZpGdbd in attP2 BJD_107F02_AV_01	SS41428	SEZ-333	P	Interneurons in AG, intersegmental neurons from T1 to T2 and T3, ascending neurons and various stochastic? Neurons on left side of brain	B
web	VT023750-p65ADZp in attP40 BJD_110C03_BB_21	VT043284-ZpGDBD in attP2 BJD_102A06_AV_01	SS41434	SEZ-334	G	Descending neurons brightly labeled, also contains one other cell type in central brain and one neuron/side in AMMC. Not covered by DN collection.	B
braces	VT023750-p65ADZp in attP40 BJD_110C03_BB_21	VT018446-ZpGDBD in attP2 BJD_135B02_AV_01	SS41439	SEZ-335	E	Secretory-type neurons in T3	P
web	VT043284-p65ADZp in attP40 BJD_102A06_BB_21	VT023750-ZpGdbd in attP2 BJD_110C03_AV_01	SS41446	SEZ-336	E	One other neuron in left AMMC	B
web	VT043284-p65ADZp in attP40 BJD_102A06_BB_21	VT026000-ZpGDBD in attP2 BJD_107E06_AV_01	SS41448	SEZ-337	G	Also contains AMMC cell type and bilateral neurons in higher brain. One other cell type in VNC	P
pleco	VT042810-p65ADZ in attP40 BJD_127G03_BB_21	VT048854-ZpGdbd in attP2 BJD_105D03_AV_01	SS41967	SEZ-573	I	May contain 1 L interneuron in T2. From Masayoshi Ito	B
diatom	VT008142-p65ADZ in attP40 BJD_116F08_BB_21	VT032776-ZpGdbd in attP2 BJD_121A02_AV_01	SS42322	SEZ-339	G	Labels segmentally repeated interneurons in VNC	P
handle	47G08-p65ADZp / CyO in attP40	VT045978-ZpGdbd in attP2 BJD_108F06_AV_01	SS42328	SEZ-340	G	Relatively clean in CB, brightly labels AG neurons and more lightly labels other neurons in VNC	B
asteroid	47G08-p65ADZp / CyO in attP40	VT017862-ZpGdbd in attP2 BJD_120B11_AV_01	SS42335	SEZ-341	G	Diffuse labeling of fiber tracts in CB, birght assymetrical labeleing of interneurons in T1 and T2, labels T3 interneurons bilaterally	P
asteroid	VT008887-p65ADZp in attP40 BJD_119H09_BB_21	50B06-ZpGdbd in attP2	SS42338	SEZ-342	I		B
whisker	VT008887-p65ADZp in attP40 BJD_119H09_BB_21	VT008142-ZpGdbd in attP2 BJD_116F08_AV_01	SS42349	SEZ-343	G	Contains two cell types, one of which is whisker. The other has a lateral cell bodies and overlaps extensively with whisker's neurites. Two large cell bodies in AG that descend	P
stand	VT043788-p65ADZp in attP40 BJD_108E03_BB_21	VT009152-ZpGdbd in attP2 BJD_116G08_AV_01	SS42377	SEZ-346	G	Several broadly arborozing neurons in VNC	P
trumpet	84D10-p65ADZp in attP40	37A11-ZpGDBD in attP2	SS42601	SEZ-348	E	Lightly labeled ascending neurons to SEZ and large cell bodied descending neuron in AG	B
trumpet and peep	w; 52E06-p65ADZp; MKRS/TM6B	84D10-ZpGDBD in attP2	SS42603	SEZ-349	E	Several lightly stained interneurons in T1 and T2	B
mute	26C03-p65ADZp in attP40	84D10-ZpGDBD in attP2	SS42606	SEZ-350	I	Descending neuron that might be involved with trumpet. Not covered by DN collection.	M
bower	w; 21F01-p65ADZp; MKRS/TM6B	VT044709-ZpGdbd in attP2 BJD_111E04_AV_01	SS42633	SEZ-353	P	Also covers another neuron type in SEZ (?) and a right TPN1 neuron	P
bower	VT058720-p65ADZp in attP40 BJD_118H12_BB_21	21F01-ZpGdbd in attP2	SS42634	SEZ-354	E	One left ascending neuron, cell bodies of bower are dim	P
sullivan	81H11-p65ADZp in attP40	26B11-ZpGdbd in attP2	SS42638	SEZ-356	I		P
sullivan	26B11-p65ADZp in attP40	81H11-ZpGdbd in attP2	SS42639	SEZ-357	I		P
knees	78B06-p65ADZp in attP40	VT030609-ZpGDBD in attP2 BJD_120H07_AV_01	SS42927	SEZ-358	E	One ascending neuron high background in several areas	B
aSG7	45B08-p65ADZp in attP40	61H08-ZpGdbd in attP2	SS43327	SEZ-359	E	Lightly labeled broadly arborizing neuron in optic lobes, neuron in ring, VNC is clean	B
aSG7	VT026953-p65ADZp in attP40 BJD_113E11_BB_21	61H08-ZpGdbd in attP2	SS43329	SEZ-360	E	One ascending neuron type and one arch neuron type	P
pringle	w; 76E09-p65ADZ; MKRS/TM6B	27A11-ZpGDBD in attP2	SS43334	SEZ-361	G	One other neuron type above the EF (fruitless positive)	P
pringle	VT036871-p65ADZp in attP40 BJD_101F04_BB_21	27A11-ZpGDBD in attP2	SS43335	SEZ-363	I	1-2 small interneurons in right T1	P
pringle	VT036871-p65ADZp in attP40 BJD_101F04_BB_21	HAV5; CyO/Sco; 70C09-ZpGDBD in attP2	SS43348	SEZ-365	E	VNC is clean, one other cell type that arborizes in the SMP	B
ruby	44A07-p65ADZp in attP40	VT007357-ZpGDBD in attP2 BJD_116F01_AV_01	SS43355	SEZ-367	E	Large cell-bodied neurons in VNC that might be on the surface. Also contains an ascending neuron from T1	P
ruby	w; 89A01-p65ADZp; MKRS/TM6B	VT039458-ZpGDBD in attP2 BJD_115G09_AV_01	SS43359	SEZ-368	G	Also contains small neuron in OL and many neurons in the VNC	P
loch ness	VT025980-p65ADZp in attP40 BJD_110D04_BB_21	VT017862-ZpGdbd in attP2 BJD_120B11_AV_01	SS43380	SEZ-370	G	Also contains a T3 interneuron and several ascending neurons	P
kelp and hydrangea	20G07-p65ADZp in attP40	VT040577-ZpGdbd in attP2 BJD_108B10_AV_01	SS43885	SEZ-372	G	VNC is clean. Labels 2L and 1R. Also labels one aDT7-like neuron projecting to the right OL.	M
kelp and hydrangea	VT037488-p65ADZ in attP40 BJD_122G10_BB_21	VT040577-ZpGdbd in attP2 BJD_108B10_AV_01	SS43887	SEZ-373	P	VNC is clean but contains both kelp and hydrangea plus an AMMC neuron	B
kelp and hydrangea	20G07-p65ADZp in attP40	VT037488-ZpGdbd in attP2 BJD_122G10_AV_01	SS43889	SEZ-375	E	Contains two neurons ascending from SEZ to SMP on left and only one on right. Covers two different types of hydrangea and lightly covers kelp.	B
aDN1	VT057294-p65ADZp in attP40 BJD_105G02_BB_21	73E12-ZpGdbd in attP2	SS43899	SEZ-377	P	Descending neuron not covered by the DN collection. Looks like G21 except for arborizations in VNC. Also contains many other neuron types in brain and VNC.	B
aDN1	18C11-p65ADZp in attP40	VT057294-ZpGdbd in attP2 BJD_105G02_AV_01	SS43907	SEZ-378	G	Descending neuron not covered by the DN collection. Looks like G21 except for arborizations in VNC. Also contains many other neuron types in brain and VNC. Better than IS43899	B
TPN4	VT028327-p65ADZp in attP40 BJD_107G02_BB_21	79B08-ZpGdbd in attP2	SS44855	SEZ-381	I		B
TPN4	VT043285-p65ADZp in attP40 BJD_127G07_BB_21	79B08-ZpGdbd in attP2	SS44856	SEZ-382	I	One interneuron in left T3.	B
TPN4	75B02-p65ADZp in attP40	VT043285-ZpGdbd in attP2 BJD_127G07_AV_01	SS44866	SEZ-385	I		B
phantom	20G06-p65ADZp /CyO in attP40; MKRS/TM6B	17H12-ZpGdbd in attP2	SS44869	SEZ-387	I	Phantom is lightly labeled, looks bilateral in polarity data.	B
phantom	82F02-p65ADZp in attP40	20G06-ZpGdbd in attP2	SS44877	SEZ-389	P	Phantom is brightly labeled. Also contains another SEZ cell type as well as several other brain cell types. VNC is clean except for interneuron in T1	B
phantom	20G06-p65ADZp /CyO in attP40; MKRS/TM6B	82F02-ZpGDBD in attP2	SS44879	SEZ-390	P	Phantom is brightly labeled. Also contains another SEZ cell type as well as several other brain cell types. VNC is clean.	B
mesa	VT050223-p65ADZp in attP40 BJD_108H06_BB_21	VT028320-ZpGdbd in attP2 BJD_117F06_AV_01	SS44892	SEZ-392	E	mesa is bright, but VNC interneurons and another CB neuron are very lightly labeled	P
mesa	VT022244-p65ADZp in attP40 BJD_123E07_BB_21	VT028320-ZpGdbd in attP2 BJD_117F06_AV_01	SS44893	SEZ-393	G	Also lightly labels MB neurons and small cell body PI neurons. Plus intersegmental VNC neuron on right side and mismatched neurons in T3 (one might be a motor neuron).	P
mesa	VT028320-p65ADZ in attP40 BJD_117F06_BB_21	VT050223-ZpGdbd in attP2 BJD_108H06_AV_01	SS44896	SEZ-394	P	Butte is very similar to mesa but only arborizes in T1. This split is very dim and contains a number of other neurons including ascending neurons and other lightly labeled neurons in the central brain. MCFO is necessary	B
mesa	VT028320-p65ADZ in attP40 BJD_117F06_BB_21	VT022244-ZpGDBD in attP2 BJD_123E07_AV_01	SS44898	SEZ-395	G	Also labels many Kenyon cells. Only arborizes in T1.	P
tulip	24E12-p65ADZp in attP40	VT022244-ZpGDBD in attP2 BJD_123E07_AV_01	SS44899	SEZ-396	G	Also covers many sensory neurons from the AG that arborize in T3 but central brain is clean	P
tulip	VT022244-p65ADZp in attP40 BJD_123E07_BB_21	24E12-ZpGdbd in attP2	SS44902	SEZ-397	G	tulip is lightly labeled, the opposite combination of the same halves is a better split. Contains small OL neruons, a neuron type that connects the OL and the AL and sensory neurons arborizing in T3	B
justice	22B12-p65ADZp in attP40	33E10-ZpGdbd in attP2	SS44906	SEZ-398	G	Also contains one left ascending neuron and a VNC interneuron type with cell body in the AG and arborizations in T3 and T2	B
slink	37D11-p56ADZp in attP40	33E10-ZpGdbd in attP2	SS44908	SEZ-400	E	Also contains many small neurons in the OL. Slink is dim but no other neurons appear to be labeled.	P
fluff	22B12-p65ADZp in attP40	37G09-ZpGDBD in attP2	SS44912	SEZ-401	G	CB is clean but also labels an ascending neuron and many neurons in T2	B
bamboo	24A02-p65ADZp in attP40	VT017416-ZpGdbd in attP2 BJD_103H12_AV_01	SS44928	SEZ-402	E	A few small neurons in upper OL, one small neuron on the left of the CB	B
bamboo	VT017416-p65ADZp in attP40 BJD_103H12_BB_21	24A02-ZpGdbd in attP2	SS44937	SEZ-403	G	Also contails ~4 VLP neurons per side	P
turner	VT058720-p65ADZp in attP40 BJD_118H12_BB_21	VT059792-ZpGdbd in attP2 BJD_114G12_AV_01	SS45676	SEZ-406	E	Contains two other ascending neurons from AG, plus perhaps one OPN? Turner is relatively dimly labeled	P
aster	VT044845-p65ADZp in attP40 BJD_111E05_BB_21	VT042833-pZpGdbd in attP2 BJD_144F06_AV_01	SS45679	SEZ-407	P	aster is lightly labeled. Another cell type with cell body in VLP and many other neurons in AG and T3	P
aster	54H04-p65ADZp in attP40	VT042833-pZpGdbd in attP2 BJD_144F06_AV_01	SS45680	SEZ-408	G	Also contains a class of ascending neurons from T1	B
aster	VT044845-p65ADZp in attP40 BJD_111E05_BB_21	VT018883-ZpGdbd in attP2 BJD_129B03_AV_01	SS45682	SEZ-409	P	Also covers many VNC neurons, sparse T, and ascending neurons from VNC	P
crab	VT063633-p65ADZp in attP40 BJD_124F07_BB_21	16D09-ZpGDBD in attP2	SS45693	SEZ-411	I	really nice!	B
crab	66A06-p65ADZp in attP40	16D09-ZpGDBD in attP2	SS45694	SEZ-412	E	contains two other neurons in VNC, one interneuron on left of T2-T3 and one ascending from left T3 to SEZ	P
crab	66A06-p65ADZp in attP40	VT063633-ZpGdbd in attP2 BJD_124F07_AV_01	SS45700	SEZ-413	I		P
shark	VT016841-p65ADZ in attP40 BJD_123D12_BB_21	VT027802-ZpGdbd in attP2 BJD_113E12_AV_01	SS45729	SEZ-415	G	Covers what is perhaps a neck motor neuron? Only on one side. Other motor-type neurons in T1 and T3	P
trogon	65D05-p65ADZp in attP40	VT027802-ZpGdbd in attP2 BJD_113E12_AV_01	SS45730	SEZ-416	E	Contains one other neuron in CB and two interneurons in T3	P
aSG1	15A09-p65ADZp in attP40	14G08-ZpGdbd in attP2	SS45898	SEZ-426	I		B
aSG1	20C04-p65ADZp in attP40	11C01-ZpGDBD in attP2	SS45903	SEZ-429	I
aSG1	w; 54D09-p65ADZp; MKRS/TM6B	20C04-ZpGDBD in attP2	SS45907	SEZ-431	G	Final imagery shows other neurons likely to the gut	P
aSG1	20C04-p65ADZp in attP40	VT000254-ZpGdbd in attP2 BJD_123B11_AV_01	SS45913	SEZ-433	I		M
aSG7	VT040545-p65ADZp in attP40 BJD_108B08_BB_21	54A09-ZpGdbd in attP2	SS45915	SEZ-435	I		P
aSG7	VT043659-p65ADZp in attP40 BJD_102A09_BB_21	VT057277-ZpGdbd in attP2 BJD_105F12_AV_01	SS45921	SEZ-436	I		P
aSG7	59A06-p65ADZp in attP40	VT000254-ZpGdbd in attP2 BJD_123B11_AV_01	SS45926	SEZ-439	I		P
aSG7	59A06-p65ADZp in attP40	VT043659-ZpGdbd in attP2 BJD_102A09_AV_01	SS45929	SEZ-441	E	Also contains one left ascending neuron from AG	P
pSG1 and aSG2	VT014341-p65ADZ in attP40 BJD_115C06_BB_21	VT063633-ZpGdbd in attP2 BJD_124F07_AV_01	SS45937	SEZ-445	E	Small Ol neurons, other lightly labeled T3 neurons. Also labels tophat.	P
pSG1 and aSG2	w; 34F03-p65ADZp; MKRS/ TM6B	24H02-ZpGdbd in attP2	SS45940	SEZ-446	E	Acending neuron from T1, this might be a clean split	B
tulip	24H12-p65ADZp in attP40	24H02-ZpGdbd in attP2	SS45941	SEZ-447	I		P
pSG1 and aSG2	w; 34F03-p65ADZp; MKRS/ TM6B	VT016255-pZpGdbd in attP2 BJD_131D03_AV_01	SS45950	SEZ-449	E	Also contains sparse T and a higher brain interneuron. Might be somewhat stochastic.	B
moor	24H12-p65ADZp in attP40	VT016255-pZpGdbd in attP2 BJD_131D03_AV_01	SS45952	SEZ-450	G	Covers sparse T and an interneuron in T3	P
aSG7	VT009152-p65ADZ in attP40 BJD_116G08_BB_21	VT037553-ZpGDBD in attP2 BJD_118A09_AV_01	SS46202	SEZ-455	E	Screening imagery is different from stable split images	P
puddle	VT037554-p65ADZ in attP40 BJD_110H12_BB_21	VT009152-ZpGdbd in attP2 BJD_116G08_AV_01	SS46204	SEZ-456	I		B
puddle	VT037553-p65ADZp in attP40 BJD_118A09_BB_21	VT009152-ZpGdbd in attP2 BJD_116G08_AV_01	SS46205	SEZ-457	E	Also covers one L neuron in T2 with large caliber neurite
trident	12D09-p65ADZp in attP40	VT040354-ZpGdbd in attP2 BJD_127E05_AV_01	SS46209	SEZ-458	E	One right interneuron in T2	B
trident	VT040354-p65ADZp in attP40 BJD_127E05_BB_21	12D09-ZpGdbd in attP2	SS46211	SEZ-459	I		P
trident	12D09-p65ADZp in attP40	22D12-ZpGdbd in attP2	SS46214	SEZ-461	I		P
gumdrop	65H09-p65ADZp in attP40	48B01-ZpGdbd in attP2	SS46373	SEZ-574	I	from Masayoshi Ito, descending neuron	B
peafowl	VT008469-p65ADZp in attP40 BJD_109E10_BB_21	VT000926-ZpGDBD in attP2 BJD_100A07_AV_01	SS46596	SEZ-572	I	From Masayoshi Ito	B
TH-VUM	VT064569-p65ADZp in attP40 BJD_103A08_BB_21	VT000611-ZpGdbd in attP2 BJD_116C07_AV_01	SS46885	SEZ-462	E	Also contains one other SEZ cell type and one type of AG interneuron	M
TH-VUM	TH-p65ADZp in attP4	VT064569-ZpGDBD in attP2 BJD_103A08_AV_01	SS46889	SEZ-463	P	Also covers PAM DANs and MANY ascending neurons from VNC. T-shirt zipper-killer would help.	B
trogon	VT033047-p65ADZp in attP40 BJD_101E05_BB_21	VT063736-ZpGDBD in attP2 BJD_124F08_AV_01	SS46912	SEZ-466	G	Also lightly labels SLP neurons and one type of T3 interneurons	B
Fdg	81E10-p65ADZp in attP40	88C07-ZpGdbd in attP2	SS46913	SEZ-467	E	Also convers one type of ascending neuron from T2	B
Fdg	VT022244-p65ADZp in attP40 BJD_123E07_BB_21	88C07-ZpGdbd in attP2	SS46914	SEZ-468	G	Ascending neuron type of T3 arborizing in SLP and OL neurons
rattle	81E10-p65ADZp in attP40	VT023745-ZpGDBD in attP2 BJD_145B11_AV_01	SS46917	SEZ-469	E	Other lightly labeled neurons in OL and SEZ	M
rose	VT000608-p65ADZp in JK22C BJD_103B03_BB_37	21F01-ZpGdbd in attP2	SS46955	SEZ-476	I		B
oink	VT057283-p65ADZp in attP40 BJD_105G01_BB_21	VT026015-ZpGdbd in attP2 BJD_126F08_AV_01	SS47078	SEZ-022	G	9 neurons in upper VNC	B
cradle	VT007849-p65ADZ in attP40 BJD_122D11_BB_21	VT033054-ZpGdbd in attP2 BJD_104E12_AV_01	SS47079	SEZ-019	E	1 weakly labeled neuron on right side of VNC	B
G2N-1	VT007746-p65ADZp in attP40 BJD_125C09_BB_21	VT043658-ZpGDBD in attP2 BJD_114B06_AV_01	SS47080	SEZ-042	E	Also labels an ascending neuron based on MCFO imagery	P
doublescoop	VT057469-p65ADZp in attP40 BJD_128F10_BB_21	VT043077-ZpGdbd in attP2 BJD_101H11_AV_01	SS47081	SEZ-036	P	doublescoop is brightly labeled by there are neurons in OL, AMMC? And FB, plus at least 3 neurons in VNC	B
G2N-1	12C04-p65ADZp in attP40	VT043658-ZpGDBD in attP2 BJD_114B06_AV_01	SS47082	SEZ-041	E	1? Neuron extending on midline of VNC	B
hound	19C05-p65ADZp in attP40	VT013872-ZpGDBD in attP2 BJD_129B10_AV_01	SS47232	SEZ-569	P	hound is very lightly labeled. PI neurons and other ascending neurons covered	B
mime	w; 28D10-p65ADZp; MKRS/ TM6B	VT044856-ZpGDBD in attP2 BJD_121F10_AV_01	SS47275	SEZ-125	G	also covers 1 descending neuron in the SEZ/side	B
trogon	w; 77D08-p65ADZ; MKRS/TM6B	VT043685-ZpGdbd in attP2 BJD_127H04_AV_01	SS47278	SEZ-479	G	Also contains SLP neurons and a number of VNC interneurons and ascending neurons	P
buddy	w; 78F07-p65ADZ; MKRS/TM6B	49C05-ZpGdbd in attP2	SS47281	SEZ-480	G	Segmentally repeated interneurons in VNC and two ascending/descending neuron overlapping with buddy	P
buddy	49C05-p65ADZp in attP40	78F07-ZpGDBD in attP2	SS47283	SEZ-481	G	Segmentally repeated interneurons in VNC and ascending/descending neuron overlapping with buddy	B
handup	VT022284-p65ADZ in attP40 BJD_117C12_BB_21	94G06-ZpGdbd in attP2	SS47287	SEZ-482	E	light OL neurons and one L descending neurons lightly labeled. T3 neurons also lightly labeled.	P
good dog	11D02-p65ADZp in attP40	VT042767-ZpGDBD in attP2 BJD_122H07_AV_01	SS47292	SEZ-484	I		B
good dog and handup	VT022284-p65ADZ in attP40 BJD_117C12_BB_21	VT042767-ZpGDBD in attP2 BJD_122H07_AV_01	SS47293	SEZ-485	G	*good because both cell types are contained, otherwise ideal	P
mute	VT002851-p65ADZp in attP40 BJD_106D03_BB_21	58G03-ZpGdbd in attP2	SS47305	SEZ-486	E	might contain two different descending cell types	B
mute	VT002851-p65ADZp in attP40 BJD_106D03_BB_21	VT019911-ZpGDBD in attP2 BJD_126C10_AV_01	SS47309	SEZ-487	P	Many other cell types in FB, AMMC, and T3
nagini	65B04-p65ADZp; MKRS/TM6B	Dfd-splitGAL4-AD	SS47322	SEZ-488	I		B
roundup	23G11-p65ADZp in attP40	12D12-ZpGdbd in attP2	SS47730	SEZ-489	I		P
roundup	11B11-p65ADZp in attP40	12D12-ZpGdbd in attP2	SS47731	SEZ-490	I	Stochastically labels other neurons but not consistent across samples	P
roundup	VT003236-p65ADZp in attP40 BJD_119E04_BB_21	23G11-ZpGDBD in attP2	SS47736	SEZ-491	E	One descending and one ascending neuron between SEZ and VNC	B
vixen	VT012719-p65ADZp in attP40 BJD_124B09_BB_21	VT034622-ZpGDBD in attP2 BJD_107H09_AV_01	SS47742	SEZ-492	P	Bright and ascending neurons from T1 and T2. Could be cleaned up with t-shirt zipper killer	B
roundup	23G11-p65ADZp in attP40	VT003236-ZpGdbd in attP2 BJD_119E04_AV_01	SS47744	SEZ-493	E	One ascending neuron from left T1 to SEZ	B
roundup	11B11-p65ADZp in attP40	VT003236-ZpGdbd in attP2 BJD_119E04_AV_01	SS47745	SEZ-494	I		P
cradle	VT033054-p65ADZp in attP40 BJD_104E12_BB_21	VT046289-ZpGDbd in attP2 BJD_121H06_AV_01	SS48137	SEZ-020	G	1 neuron/side arborizing in abdominal ganglion	B
cradle	VT033054-p65ADZp in attP40 BJD_104E12_BB_21	93D02-ZpGDBD in attP2	SS48139	SEZ-015	G	1 brightly stained neuron projecting from VNC into right side of SEZ, arborizing in AVLP	P
cradle	VT040540-p65ADZp in attP40 BJD_108B06_BB_21	93D02-ZpGDBD in attP2	SS48141	SEZ-016	G	1 neuron/side with inputs in SLP, SCL, and MB vertical lobe, 1 neuron/side overlapping with cradle in SEZ	P
cradle	VT050223-p65ADZp in attP40 BJD_108H06_BB_21	52D11-ZpGdbd in attP2	SS48142	SEZ-013	I	seems stochastic	P
bay	VT050387-p65ADZp in attP40 BJD_114E02_BB_21	24A02-ZpGdbd in attP2	SS48939	SEZ-498	G	Ascending neurons to SEZ, also SLP and left OL	P
FMIn	81E10-p65ADZp in attP40	17G10-ZpGDBD in attP2	SS48944	SEZ-499	E	one right ascending neuron to VLP	B
clavicle	VT020732-p65ADZp in attP40 BJD_120D01_BB_21	17G10-ZpGDBD in attP2	SS48947	SEZ-501	G	one TPN1 and several T2 interneurons. Two broadly arborizing neurons with cell bodies in SLP.	B
FMIn and clavicle	40B08-p65ADZp in attP40	17G10-ZpGDBD in attP2	SS48948	SEZ-502	G	2 FMIn neurons and clavicle. Also covers one right SLP neuron with broad arborizations in the brain and ascending T3 neurons.	B
FMIn	81E10-p65ADZp in attP40	21H11-ZpGdbd in attP2	SS48949	SEZ-503	G	Lots of ascending neurons from T3 and T2 to SEZ and VLP. Could be cleaned up with tshirt zipper killer	B
vice	VT019074-p65ADZp in attP40 BJD_120C06_BB_21	47H07-ZpGdbd in attP2	SS49415	SEZ-026	G	vice is dim, one dim neuron on right side central brain, one in VNC on left	B
turner	VT050229-p65ADZp in attP40 BJD_108H07_BB_21	53F03-ZpGdbd in attP2 (backcrossed to CSMH for 5 gen)	SS49422	SEZ-508	I		M
spirit	VT034612-p65ADZp in attP40 BJD_127B07_BB_21	28F06-ZpGDBD in attP2	SS49430	SEZ-509	I		P
rattle	VT006545-p65ADZp in attP40 BJD_103D09_BB_21	VT023745-ZpGDBD in attP2 BJD_145B11_AV_01	SS50091	SEZ-513	G	VNC has intersegmental neurons	B
bridle	12D09-p65ADZp in attP40	68B03-ZpGDBD in attP2	SS50095	SEZ-515	G	VNC is clean, but one other cell type with projections out of the brain (bubba)	P
bridle and bubbA	71G01-p65ADZp in attP40	68B03-ZpGDBD in attP2	SS50098	SEZ-516	G	Large secretory-type neurons in T3 and AG. SLP neurons (2/side) and one other cell type near bridle with projections out of the brain (bubba)	P
bridle and bubbA	12D09-p65ADZp in attP40	VT039462-ZpGDBD in attP2 BJD_145A10_AV_01	SS50101	SEZ-518	G	Vnc has lightly covered interneuron type, several stochastic-looking neurons in right half of brain. Bubba is also covered (overlapping with bridle but more medial cell body, slightly smaller and has projections out of the brain)	B
bridle and bubbA	12D09-p65ADZp in attP40	VT000254-ZpGdbd in attP2 BJD_123B11_AV_01	SS50106	SEZ-521	G	Contains 2 bubba + 2 bridle/side. VNC has ~3 AG cells plus very lightly labeled interneurons (segmetally repeating)	B
bridle and bubbA	VT039462-p65ADZp in attP40 BJD_145A10_BB_21	12D09-ZpGdbd in attP2	SS50111	SEZ-522	G	Contains 2 bubba only on one side. SEZ has circular interneurons in T2 only.	P
bridle	VT026953-p65ADZp in attP40 BJD_113E11_BB_21	VT056376-ZpGdbd in attP2 BJD_114E12_AV_01	SS50120	SEZ-523	G	Also contains sparse T and one type of T3 interneuron	P
homer	VT037488-p65ADZ in attP40 BJD_122G10_BB_21	VT008977-ZpGdbd in attP2 BJD_106F10_AV_01	SS50142	SEZ-525	E	somewhat lightly labeled, has a few sensory inputs to upper T3 and a stochastic-looking ascending neuron on the left	P
homer	46E07-p65ADZp in attP40	VT008977-ZpGdbd in attP2 BJD_106F10_AV_01	SS50143	SEZ-526	I		B
wafflecone	VT006202-p65ADZp in attP40 BJD_106E04_BB_21	47G08-ZpGdbd in attP2	SS50698	SEZ-537	E	2 interneurons/side in T3 leg neuropil.	P
nori	VT006202-p65ADZp in attP40 BJD_106E04_BB_21	VT004422-ZpGdbd in attP2 BJD_124A12_AV_01	SS50701	SEZ-538	E	2 small interneurons with round arborizations descending from AG.	P
moor and nori	47G08-p65ADZp / CyO in attP40	VT004422-ZpGdbd in attP2 BJD_124A12_AV_01	SS50702	SEZ-539	G	Other lightly stained SEZ interneurons with more lateral cell bodies. Segmentall repeated VNC interneurons and a number of larger-cell bodied neurons descending from AG.	B
fox	Dfd-AD	VT033647-ZpGDBD in attP2	SS51914	SEZ-540	E	Also contains kelp but VNC is clean
bump	VT044845-p65ADZp in attP40 BJD_111E05_BB_21	Dfd-DBD	SS51916	SEZ-541	E	Also contains several descending neurons but morphology isn't clear
whisker	VT008887-p65ADZp in attP40 BJD_119H09_BB_21	VT047325-ZpGdbd in attP2 BJD_111F09_AV_01	SS51922	SEZ-544	I		P
tentacular	VT004454-p65ADZp in attP40 BJD_115B10_BB_21	VT004984-ZpGdbd in attP2 BJD_119F03_AV_01	SS51930	SEZ-545	E	SEZ contains ~2 other lightly stained interneurons. VNC is clean.	B
linea	VT037554-p65ADZ in attP40 BJD_110H12_BB_21	VT004454-ZpGdbd in attP2 BJD_115B10_AV_01	SS51933	SEZ-546	E	SEZ contains 1 other cell body, unsure of identity.	P
moor	VT063219-p65ADZ in attP40 BJD_119B09_BB_21	67E03-ZpGdbd in attP2	SS51939	SEZ-548	E	Also contains glia? With arborizations between the LP and the lobula. VNC is clean.	P
horntail	VT043284-p65ADZp in attP40 BJD_102A06_BB_21	72B07-ZpGdbd in attP2	SS51950	SEZ-550	I		B
twirl	VT026004-p65ADZp in attP40 BJD_113E04_BB_21	58F07-ZpGdbd in attP2	SS51958	SEZ-552	E	Lightly stained neurons in SIP and several stochastic-looking VNC neurons	B
sundrop	VT004984-p65ADZp in attP40 BJD_119F03_BB_21	23C06-ZpGdbd in attP2	SS51985	SEZ-553	P	LH neurons and OL neurons that cross the upper brain. VNC has bright interneurons in T2 and ascending neurons from T3.	P
sundrop	VT063220-p65ADZp in attP40 BJD_119B10_BB_21	23C06-ZpGdbd in attP2	SS51987	SEZ-555	E	One lightly labeled ascending neuron on right side.	P
sundrop	VT004984-p65ADZp in attP40 BJD_119F03_BB_21	VT026665-ZpGDBD in attP2 BJD_117E07_AV_01	SS51988	SEZ-556	I	May only cover left or right sundrop, stochastic	B
sundrop	VT038225-p65ADZp in attP40 BJD_108A03_BB_21	VT026665-ZpGDBD in attP2 BJD_117E07_AV_01	SS51989	SEZ-557	E	Also covers 1 Kenyon cell/side and 1L T cell?	P
coy	VT040354-p65ADZp in attP40 BJD_127E05_BB_21	VT000926-ZpGDBD in attP2 BJD_100A07_AV_01	SS51996	SEZ-559	E	Appears to be an unpaired neuron type. 3 very lightly labeled segmentally repeated VNC interneurons along the center of the VNC. Very similar to IS51997.	P
coy	VT040348-p65ADZp in attP40 BJD_104H02_BB_21	VT000926-ZpGDBD in attP2 BJD_100A07_AV_01	SS51997	SEZ-560	E	3 very lightly labeled segmentally repeated VNC interneurons along the center of the VNC. Very similar to IS51996. Also contains repeating neurons in the OL.	B
kubo	VT040354-p65ADZp in attP40 BJD_127E05_BB_21	VT000772-ZpGdbd in attP2 BJD_106C03_AV_01	SS52001	SEZ-562	G	One neuron per side projecting from PVLP to lobula, arch-shaped interneurons in T3	P
eiffel	VT056376-p65ADZ in attP40 BJD_114E12_BB_21	24C04-ZpGdbd in attP2	SS52029	SEZ-565	G	3 neurons/side in PLP. Many neurons in AG.	P
eiffel	VT056376-p65ADZ in attP40 BJD_114E12_BB_21	VT021374-ZpGdbd in attP2 BJD_113C10_AV_01	SS52034	SEZ-568	E	Also covers a pair of ascending neuron from T1.	B
doublescoop	VT008453-p65ADZp in attP40 BJD_112E07_BB_21	VT043077-ZpGdbd in attP2 BJD_101H11_AV_01	SS55570	SEZ-035	E	A few lightly labeled cells in medulla	P
G2N-1	12C04-p65ADZp in attP40	VT020839-ZpGDBD in attP2 BJD_104B09_AV_01	SS56399	SEZ-043	G	Labels TPN1 and a cell type in the central complex	P
